# Supplementary material
Source: PubMed Central journal article supplement (PMC7855995)
Supplement: NIHMS1636892-supplement-1.pdf [file NIHMS1636892-supplement-1.pdf]

## Supplementary Figures

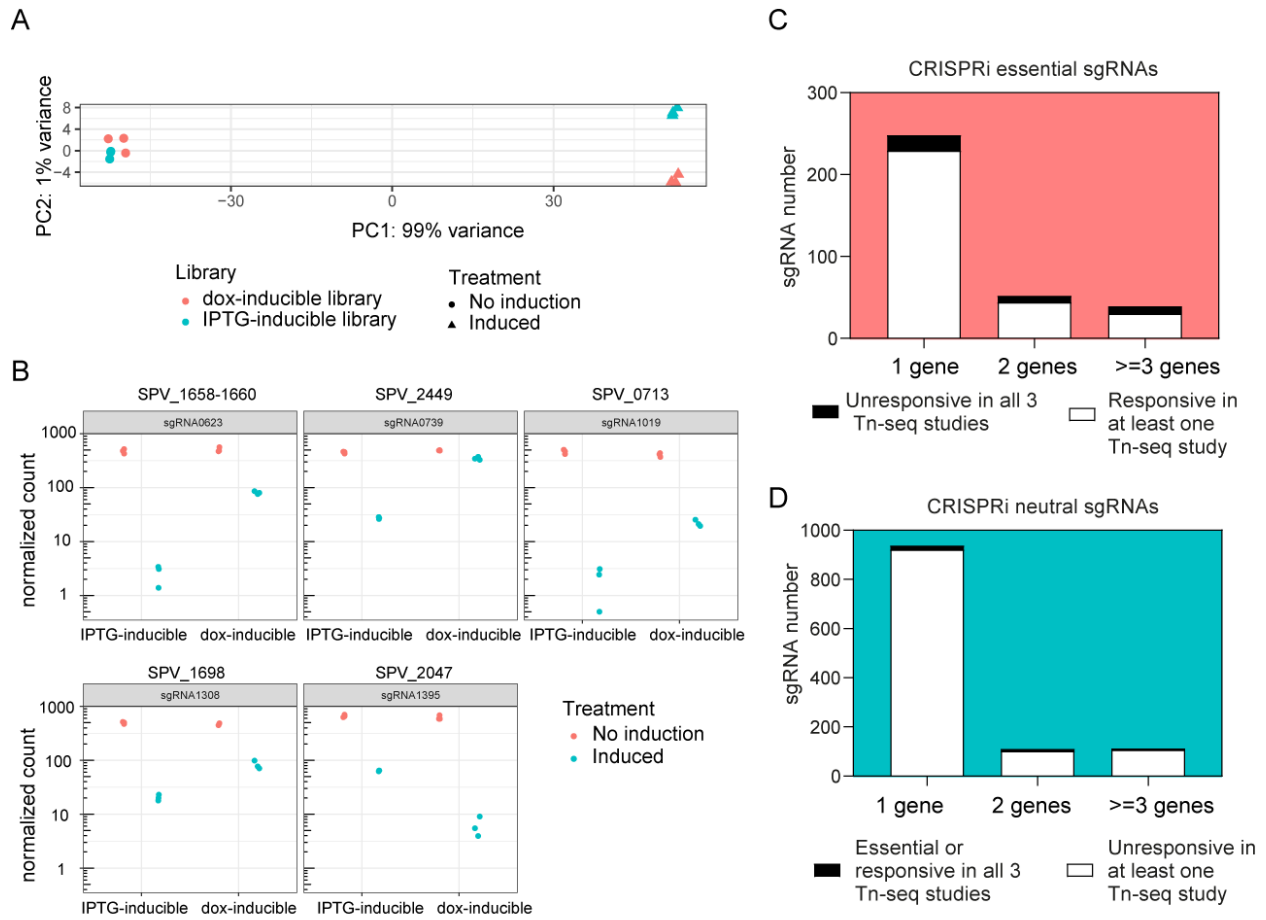

**Figure S1.** CRISPRi-seq with the IPTG- and dox-inducible libraries in C+Y medium. (A) PCA analysis of the samples grown in C+Y medium with or without inducer. (B) The sgRNAs that showed significantly different fold change of control sample and induced samples between the dox-inducible library and IPTG-inducible library. (C-D) Comparison of the essential gene list identified by CRISPRi-seq and Tn-seq. Related to Figure 3.

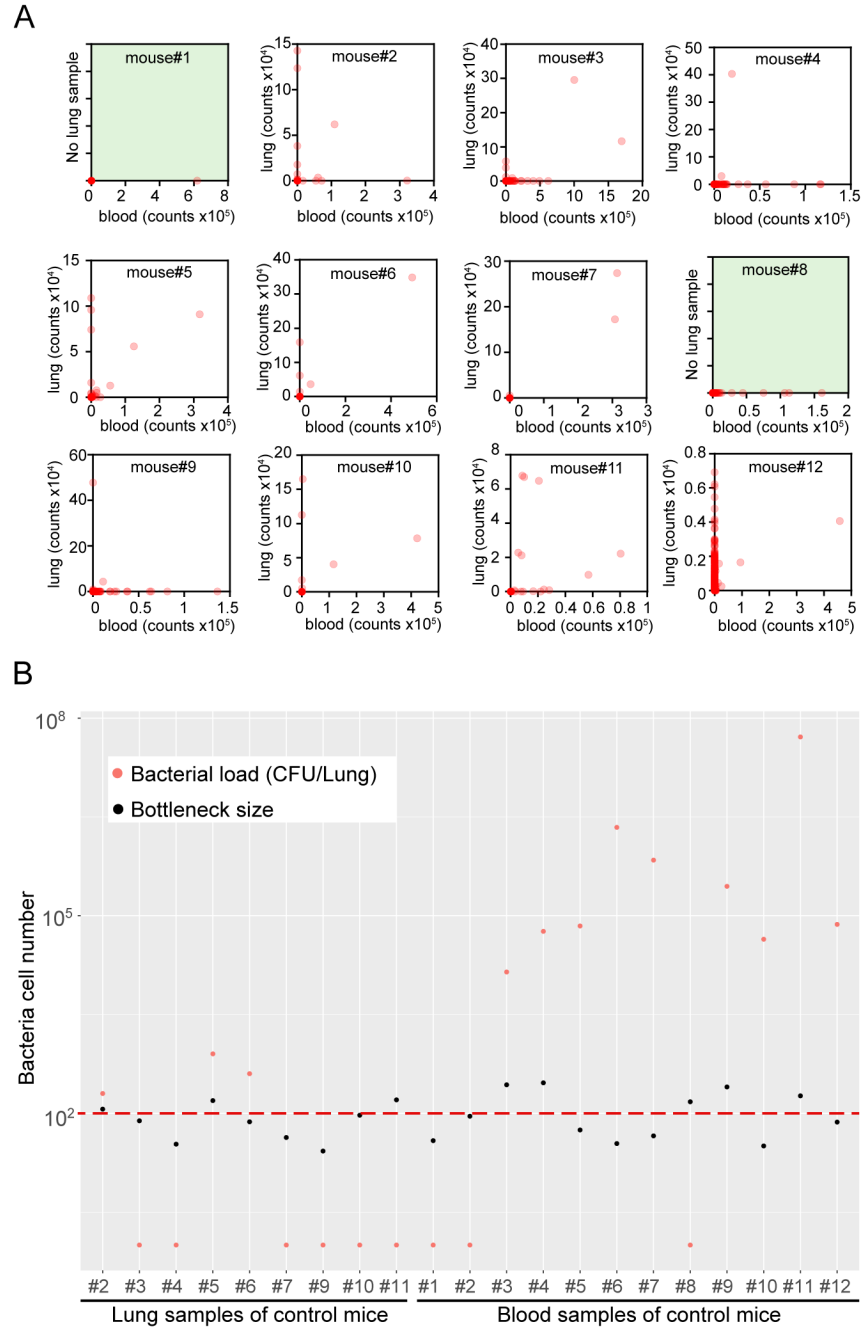

**Figure S2.** Heterogeneity of infection in murine pneumonia model at 48 hpi. (A) Correlation of sgRNA abundance between lung and blood samples per mouse at 48 hpi, in the control group (not treated with doxycycline). Note for mouse #3 and mouse #8, we failed to collect bacteria from lung samples, so only the sgRNA abundance of blood samples was shown for these two mice. (B) Comparison of bacterial load to estimated bottleneck size in the mouse pneumonia model at 48 hpi. Bacterial load (CFU/Lung) was determined by plating homogenized tissue and numerating colony numbers. Notice that 100 CFU/Lung is the detective limits (red dash line). The red dots below 100 represents bacterial load under detective limits. Bottleneck size was estimated on the basis of allele (here: sgRNA) frequencies in the pool before and after infection as described in the materials and methods. Related to Figure 4.

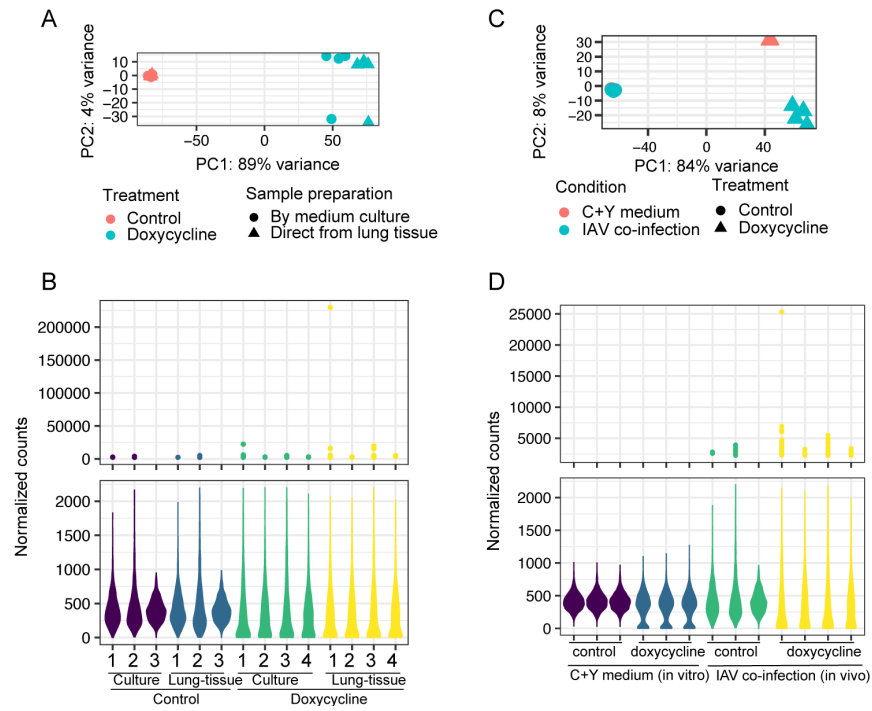

**Figure S3.** CRISPRi-seq in IAV superinfection model with dox-inducible library. (A) PCA analysis of the samples collected by culturing bacteria from lung tissue in THY medium, or directly from lung tissue without further culturing, with or without inducer. (B) Distribution of normalized counts of sgRNAs in the samples as in panel A. (C) PCA analysis of the *in vitro* (C+Y medium) and *in vivo* (IAV co-infection) samples, with or without induction. (D) Distribution of normalized counts of sgRNAs in the samples as in panel C. Related to Figure 6 and STAR methods.

**Table S8. Strains and plasmids used in this study**, related to STAR methods

| Strains/Plasmids                             | Genotype                                                                                                                                                                                    | Reference                |
|----------------------------------------------|---------------------------------------------------------------------------------------------------------------------------------------------------------------------------------------------|--------------------------|
| <i>S. pneumoniae</i>                         |                                                                                                                                                                                             |                          |
| D39V                                         | Serotype 2 strain, wild-type                                                                                                                                                                | (Slager et al., 2018)    |
| DCI23                                        | D39V, $\Delta bgaA::P_{lac-dcas9sp}$ (tet <sup>R</sup> ); $\Delta prsI::PF6-lacI$ (Gm <sup>R</sup> )                                                                                        | (Liu et al., 2017)       |
| VL1780                                       | D39V, $hlpA::hlpA\_hlpA-mScarlet-I$ (cam <sup>R</sup> )                                                                                                                                     | (Kurushima et al., 2020) |
| XL28                                         | D39V, $\Delta bgaA::P_{lac-dcas9sp}$ (tet <sup>R</sup> ); $\Delta prsI::PF6-lacI$ (Gm <sup>R</sup> ); $*cil::P3-luc$ (kan <sup>R</sup> ), $\Delta CEP::P3-sgRNA_{luc}$ (spec <sup>R</sup> ) | (Liu et al., 2017)       |
| D-T-PEP9Ptet                                 | D39V, $\Delta prsI::PF6-tetR$ (Gm <sup>R</sup> ); $\Delta CEP::P_{tet-luc-gfp}$ (spec <sup>R</sup> )                                                                                        | (Sorg et al., 2019)      |
| VL2210                                       | D39, $\Delta prsI::PF6-tetR$                                                                                                                                                                | This study               |
| VL2212                                       | D39, $\Delta prsI::PF6-tetR$ , $\Delta bgaA::P_{tet-dcas9}$                                                                                                                                 | This study               |
| VL2339                                       | D39, $\Delta prsI::PF6-tetR$ , $\Delta bgaA::P_{tet-dcas9}$ , $cil*::P_{lac-mNeonGreen}$ (Kan <sup>R</sup> )                                                                                | This study               |
| VL2351                                       | D39, $\Delta prsI::PF6-tetR$ , $\Delta bgaA::P_{tet-dcas9}$ , $cil*::P_{lac-mNeonGreen}$ (Kan <sup>R</sup> ), $hlpA::hlpA-mScarlet-I$ (cam <sup>R</sup> )                                   | This study               |
| VL3106                                       | D39V, $\Delta ccnC::eryR$                                                                                                                                                                   | This study               |
| VL3107                                       | D39V, $\Delta purA::eryR$                                                                                                                                                                   | This study               |
| VL3108                                       | D39V, $\Delta srf-28::eryR$                                                                                                                                                                 | This study               |
| VL3109                                       | D39V, $\Delta pezT::eryR$                                                                                                                                                                   | This study               |
| VL3110                                       | D39V, $\Delta ylmE::eryR$                                                                                                                                                                   | This study               |
| VL3111                                       | D39V, $\Delta SPV\_0007::eryR$                                                                                                                                                              | This study               |
| VL3112                                       | D39V, $\Delta SPV\_1234::eryR$                                                                                                                                                              | This study               |
| VL3113                                       | D39V, $\Delta SPV\_1235::eryR$                                                                                                                                                              | This study               |
| VL3114                                       | D39V, $\Delta pezA-T::eryR$                                                                                                                                                                 | This study               |
| VL3168                                       | D39V, $\Delta ccnC::eryR$ , $ZIP*::P-ccnC$ (Native promoter of <i>purA-ccnC</i> operon was used)                                                                                            | This study               |
| VL3169                                       | D39V, $\Delta purA::eryR$ , $ZIP*::P-purA$ (Native promoter of <i>purA-ccnC</i> operon was used)                                                                                            | This study               |
| VL3462                                       | D39V, $\Delta metK::eryR$                                                                                                                                                                   | This study               |
| VL3508                                       | D39V, $\Delta cps::eryR$                                                                                                                                                                    | This study               |
| VL237                                        | D39V, $\Delta ply::cmR$                                                                                                                                                                     | (Hassane et al., 2017)   |
| Plasmids                                     |                                                                                                                                                                                             |                          |
| pPEPZ-sgRNAclone                             | $ZIP*$ , spec <sup>R</sup> , P3, mCherry, sgRNA(dCas9handling+terminator), $'ZIP*$                                                                                                          | This study               |
| pPEP8T4-1                                    | $CEP*$ , spec <sup>R</sup> , <i>tetR</i> , PT4-1, <i>luc-gfp</i> , $'CEP*$                                                                                                                  | (Sorg et al., 2019)      |
| pASR110 (pPEPZ-P <sub>lac</sub> -mNeonGreen) | $ZIP*$ , spec <sup>R</sup> , P <sub>lac</sub> -mNeonGreen, $'ZIP*$                                                                                                                          | (Keller et al., 2019)    |
| pPEPY-P <sub>lac</sub>                       | $cil*$ , kan <sup>R</sup> , P <sub>lac</sub> , MCS, $'cil*$                                                                                                                                 | (Keller et al., 2019)    |
| pJWV502                                      | <i>ampR</i> , <i>bgaA</i> , <i>tet<sup>R</sup></i> , P <sub>Zn</sub> - <i>gfp</i> , <i>ery<sup>R</sup></i> , <i>'bgaA</i>                                                                   | (Liu et al., 2017)       |

Notes:

1. cam<sup>R</sup>: chloramphenicol resistance; ery<sup>R</sup>: erythromycin resistance; Gm<sup>R</sup>: gentamycin resistance; kan<sup>R</sup>: kanamycin resistance; spec<sup>R</sup>: spectinomycin resistance; tet<sup>R</sup>: tetracycline resistance
2. \*P<sub>lac</sub>: The IPTG inducible promoter

3. \*P<sub>tet</sub>: the tetracycline inducible promoter. The here used P<sub>tet</sub> represents PT4-1 in our previous study (Sorg et al., 2019)
4. \*cil: chromosome intergration locus, represents a non-coding region between SPD\_0422 and SPD\_0423
5. \*ZIP: pPEPZ intergration site at locus *spv\_2417* (Keller et al., 2019)
